# Supplementary material
Source: PubMed Central journal article supplement (PMC5821431)
Supplement: NIHMS900516-supplement-Supplemental_Table_S1.pdf [file NIHMS900516-supplement-Supplemental_Table_S1.pdf]

**Table S1.** Baseline characteristics of the study sample, Medical Birth Registry of Norway 1967-2002, with follow-up of cardiovascular death until 2009.

|                                  |                    | <b>Total (%)</b> |
|----------------------------------|--------------------|------------------|
|                                  |                    | <b>711 733</b>   |
| <b>MOTHERS</b>                   |                    |                  |
| Mothers with missing values      |                    | 7                |
| Mothers in the analyses          |                    | 711 726 (100)    |
| Mothers age (years)              | <20                | 102 672 (14)     |
|                                  | 20-24              | 301 492 (42)     |
|                                  | 25-29              | 218 262 (31)     |
|                                  | 30-34              | 69 537 (10)      |
|                                  | ≥35                | 19 763 (3)       |
| Birth weight (gram) of firstborn | 500-999            | 7800 (1)         |
|                                  | 1000-1499          | 6565 (1)         |
|                                  | 1500-1999          | 20 043 (3)       |
|                                  | 2000-2499          | 88 420 (12)      |
|                                  | 2500-2999          | 247 028 (35)     |
|                                  | 3000-3499          | 240 511 (34)     |
|                                  | 3500-3999          | 85 631 (12)      |
|                                  | ≥4000              | 15 728 (2)       |
| z-score of firstborn             | -4 to -2.5 (1.5)   | 10 320 (1)       |
|                                  | -2.5 to -1.5 (1)   | 60 500 (8.5)     |
|                                  | -1.5 to -1 (0.5)   | 86 506 (12)      |
|                                  | -0.5 to -0.5 (0.5) | 130 887 (18)     |
|                                  | -0.5 to 0.5 (1)    | 269 665 (38)     |
|                                  | 0.5 to 1 (0.5)     | 80 348 (11)      |
|                                  | 1 to 1.5 (0.5)     | 42 274 (6)       |
|                                  | 1.5 to 2.5 (1)     | 26 418 (4)       |
|                                  | 2.5 to 4 (1.5)     | 4808 (0.5)       |
| Cardiovascular Deaths            |                    | 2279 (0.32)      |
| <b>FATHERS</b>                   |                    | 711 733          |
| Fathers with missing values      |                    | 11 521           |
| Fathers in the analyses          |                    | 700 212 (100)    |
| Fathers age (years)              | <20                | 23 098 (3)       |
|                                  | 20-24              | 217 741 (32)     |
|                                  | 25-29              | 268 459 (38)     |
|                                  | 30-34              | 127 156 (18)     |
|                                  | ≥35                | 63 758 (9)       |
| Birth weight (gram) of firstborn | 500-999            | 6601 (1)         |
|                                  | 1000-1499          | 6277 (1)         |
|                                  | 1500-1999          | 19 545 (3)       |
|                                  | 2000-2499          | 86 701 (12)      |
|                                  | 2500-2999          | 243 310 (35)     |
|                                  | 3000-3499          | 235 543(34)      |
|                                  | 3500-3999          | 86 678 (12)      |
|                                  | ≥4000              | 15 557 (2)       |
| z-score of firstborn             | -4 to -2.5 (1.5)   | 9 839 (1.4)      |
|                                  | -2.5 to -1.5 (1)   | 59 062 (8.4)     |
|                                  | -1.5 to -1 (0.5)   | 84 867 (12.1)    |
|                                  | -0.5 to -0.5 (0.5) | 128 845 (18.4)   |
|                                  | -0.5 to 0.5 (1)    | 265 925 (38)     |
|                                  | 0.5 to 1 (0.5)     | 79 311 (11)      |
|                                  | 1 to 1.5 (0.5)     | 41 686 (6)       |
|                                  | 1.5 to 2.5 (1)     | 26 001 (4)       |
|                                  | 2.5 to 4 (1.5)     | 4 676 (0.7)      |
| Cardiovascular Deaths            |                    | 10 163 (1.45)    |
